# Supplementary material
Source: MDPI journal article supplement (https://www.mdpi.com/2073-4441/14/21/3543)
Supplement: s1 [file s1]

# Aquatic macrophytes shape the foraging efficiency, trophic niche breadth, and overlap among small fishes in a Neotropical river

Water

Quirino, B.A.; Thomaz, S.M.; Jeppesen, E.; Sondergaard, M.; Dainez-Filho, M.S.; Fugi, R.

\*Corresponding author. Email address: barbara\_aq@hotmail.com

**Table S1** Macrophyte species sampled in the Baía River, Brazil.

| <b>Taxa</b>                                            | <b>Growth form</b> |
|--------------------------------------------------------|--------------------|
| <b>Araceae</b>                                         |                    |
| <i>Pistia stratiotes</i> L.                            | free floating      |
| <b>Araliaceae</b>                                      |                    |
| <i>Hydrocotyle ranunculoides</i> L.                    | free floating      |
| <b>Cyperaceae</b>                                      |                    |
| <i>Eleocharis</i> sp.                                  | emergent           |
| <i>Oxycaryum cubense</i> (Poepp. & Kunth) Lye          | epiphyte           |
| <b>Hydrocharitaceae</b>                                |                    |
| <i>Limnobium laevigatum</i> (H. B. K. ex Willd.) Heine | free floating      |
| <b>Menyanthaceae</b>                                   |                    |
| <i>Nymphoides indica</i> (L.) Kuntze                   | rooted floating    |
| <b>Poaceae</b>                                         |                    |
| <i>Paspalum repens</i> Berg.                           | rooted floating    |
| <b>Polygonaceae</b>                                    |                    |
| <i>Polygonum acuminatum</i> Kunth.                     | emergent           |
| <i>Polygonum ferrugineum</i> Weed.                     | emergent           |
| <i>Polygonum stelligerum</i> Cham.                     | emergent           |
| <b>Pontederiaceae</b>                                  |                    |
| <i>Eichhornia crassipes</i> (Mar.) Salsus.             | free floating      |
| <i>Eichhornia azurea</i> Kunth.                        | rooted floating    |
| <b>Ricciaceae</b>                                      |                    |
| <i>Ricciocarpos natans</i> (L.)                        | free floating      |
| <b>Salviniaceae</b>                                    |                    |
| <i>Azolla filiculoides</i> Lam.                        | free floating      |
| <i>Salvinia auriculata</i> Auble.                      | free floating      |
| <i>Salvinia biloba</i> Raddi.                          | free floating      |
| <i>Salvinia minima</i> Bak                             | free floating      |

**Table S2** Fish species sampled in aquatic macrophyte stands in the Baía River, Brazil.

| Taxa                                                              |
|-------------------------------------------------------------------|
| <b>CHARACIFORMES</b>                                              |
| <b>Anostomidae</b>                                                |
| <i>Leporinus lacustris</i> Campos, 1945                           |
| <b>Characidae</b>                                                 |
| <i>Astyanax lacustris</i> (Lütken, 1875)                          |
| <i>Aphyocharax anisitsi</i> Eigenmann, Kennedy, 1903*             |
| <i>Aphyocharax dentatus</i> Eigenmann, Kennedy, 1903              |
| <i>Hemigrammus ora</i> Zarske, Le Bail, Géry, 2006*               |
| <i>Hyphessobrycon eques</i> (Steindachner, 1882)*                 |
| <i>Hyphessobrycon moniliger</i> Moreira, Lima, Costa, 2002*       |
| <i>Moenkhausia bonita</i> Benine, Castro, Sabino, 2004*           |
| <i>Moenkhausia forestii</i> Benine, Mariguela, Oliveira, 2004*    |
| <i>Moenkhausia sanctaefilomenae</i> (Steindachner, 1907)*         |
| <i>Psellogrammus kennedyi</i> (Eigenmann, 1903)*                  |
| <i>Roeboides descalvadensis</i> Fowler, 1932*                     |
| <i>Serrapinnus calliurus</i> (Boulenger, 1900)                    |
| <i>Serrapinnus notomelas</i> (Eigenmann, 1915)                    |
| <i>Serrapinnus</i> sp. 1                                          |
| <i>Serrapinnus</i> sp. 2                                          |
| <b>Crenuchidae</b>                                                |
| <i>Characidium</i> sp.                                            |
| <b>Curimatidae</b>                                                |
| <i>Steindachnerina brevipinna</i> (Eigenmann, Eigenmann, 1889)    |
| <b>Erythrinidae</b>                                               |
| <i>Hoplias mbigua</i> Azpelicueta, Benítez, Aichino, Mendez, 2015 |
| <b>Lebiasinidae</b>                                               |
| <i>Pyrhulina australis</i> Eigenmann, Kennedy, 1903*              |
| <b>GYMNOTIFORMES</b>                                              |
| <b>Hypopomidae</b>                                                |
| <i>Brachyhypopomus gauderio</i> Giora, Malabarba, 2009            |
| <b>CICHLIFORMES</b>                                               |
| <b>Cichlidae</b>                                                  |
| <i>Apistogramma combrae</i> (Regan, 1906)*                        |
| <i>Crenicichla britskii</i> Kullander, 1982                       |
| <i>Laetacara araguaiae</i> Ottoni, Costa, 2009*                   |
| <b>CYPRINODONTIFORMES</b>                                         |
| <b>Poeciliidae</b>                                                |
| <i>Pamphorhychties hollandi</i> (Henn, 1916)                      |

\*Species used in trophic niche analyses.

**Table S3** The number of stomachs of each fish species analyzed in each macrophyte stand to calculate trophic niche breadth and overlap.

| Macrophyte stand | <i>A.<br/>anisitsi</i> | <i>A.<br/>combrae</i> | <i>H.<br/>ora</i> | <i>H.<br/>eques</i> | <i>H.<br/>moniliger</i> | <i>L.<br/>araguaiae</i> | <i>M.<br/>bonita</i> | <i>M.<br/>forestii</i> | <i>M.<br/>sanctaeofilomenae</i> | <i>P.<br/>kennedyi</i> | <i>P.<br/>australis</i> | <i>R.<br/>descalvadensis</i> | Total       |
|------------------|------------------------|-----------------------|-------------------|---------------------|-------------------------|-------------------------|----------------------|------------------------|---------------------------------|------------------------|-------------------------|------------------------------|-------------|
| 1                |                        |                       |                   |                     |                         | 3                       |                      | 18                     |                                 |                        | 2                       |                              | 23          |
| 2                |                        | 2                     |                   | 10                  |                         | 3                       |                      | 25                     | 2                               |                        | 3                       |                              | 45          |
| 3                | 6                      | 2                     | 4                 | 19                  | 3                       |                         |                      | 20                     |                                 | 2                      | 4                       |                              | 60          |
| 4                | 17                     | 3                     | 8                 | 31                  |                         |                         | 30                   | 30                     | 6                               | 5                      |                         |                              | 130         |
| 5                |                        | 4                     |                   | 3                   |                         |                         |                      | 4                      |                                 |                        | 2                       |                              | 13          |
| 6                |                        |                       |                   |                     |                         |                         | 14                   | 4                      |                                 |                        |                         |                              | 18          |
| 7                |                        | 9                     | 6                 | 7                   |                         | 9                       |                      | 29                     | 3                               |                        | 11                      |                              | 74          |
| 8                | 6                      |                       | 26                | 17                  |                         |                         | 30                   | 30                     | 5                               |                        |                         |                              | 114         |
| 9                |                        | 3                     | 15                | 29                  |                         |                         | 31                   | 30                     | 7                               | 2                      | 3                       |                              | 120         |
| 10               |                        |                       |                   |                     |                         | 2                       |                      | 9                      | 2                               |                        | 4                       |                              | 17          |
| 11               |                        |                       | 2                 | 22                  |                         | 2                       |                      | 3                      |                                 |                        |                         |                              | 29          |
| 12               |                        |                       | 8                 | 18                  | 5                       | 6                       | 4                    | 30                     | 2                               | 8                      | 5                       |                              | 86          |
| 13               |                        |                       |                   |                     |                         |                         | 2                    | 12                     | 2                               |                        |                         |                              | 16          |
| 14               |                        |                       |                   | 14                  |                         |                         | 8                    | 9                      |                                 |                        |                         |                              | 31          |
| 15               |                        |                       |                   |                     |                         |                         | 3                    | 3                      |                                 |                        |                         |                              | 6           |
| 16               |                        |                       | 2                 | 11                  | 2                       |                         |                      | 20                     |                                 |                        |                         |                              | 35          |
| 17               |                        |                       | 5                 | 3                   |                         |                         | 19                   | 17                     |                                 |                        |                         |                              | 44          |
| 18               |                        |                       |                   |                     |                         |                         | 7                    | 6                      |                                 |                        |                         | 2                            | 15          |
| 19               |                        |                       |                   | 7                   |                         |                         |                      | 30                     |                                 |                        | 2                       |                              | 39          |
| 20               |                        | 3                     |                   |                     |                         |                         |                      | 30                     | 2                               | 5                      |                         |                              | 40          |
| 21               |                        |                       |                   | 2                   |                         |                         | 23                   | 30                     | 4                               |                        | 3                       |                              | 62          |
| 22               |                        |                       |                   | 10                  |                         |                         |                      | 29                     | 2                               |                        | 9                       |                              | 50          |
| 23               |                        | 2                     |                   |                     |                         |                         | 9                    | 6                      | 2                               |                        |                         |                              | 19          |
| 24               |                        | 3                     |                   | 12                  |                         | 3                       |                      | 21                     |                                 |                        | 5                       |                              | 44          |
| 25               |                        | 2                     |                   | 31                  |                         | 9                       |                      | 30                     |                                 |                        | 8                       |                              | 80          |
| 26               |                        |                       |                   | 15                  |                         |                         |                      | 24                     | 4                               |                        | 7                       |                              | 50          |
| 27               |                        |                       |                   | 2                   |                         | 6                       |                      | 30                     | 2                               |                        | 9                       |                              | 49          |
| 28               | 3                      |                       |                   | 2                   |                         |                         | 30                   | 25                     |                                 | 12                     | 5                       |                              | 77          |
| 29               |                        | 10                    |                   |                     |                         |                         | 4                    | 17                     | 5                               | 2                      | 3                       |                              | 41          |
| 30               |                        |                       |                   |                     |                         |                         | 30                   | 30                     | 7                               | 6                      | 6                       |                              | 79          |
| <b>Total</b>     | <b>32</b>              | <b>43</b>             | <b>76</b>         | <b>265</b>          | <b>10</b>               | <b>43</b>               | <b>244</b>           | <b>601</b>             | <b>57</b>                       | <b>42</b>              | <b>91</b>               | <b>2</b>                     | <b>1506</b> |

**Table S4** Limnological parameters and biotic communities in each macrophyte stand sampled in the Baía River. NA= No available data.

| Stand | Water temperature<br>(°C) | pH          | Conductivity<br>(µS/cm) | Dissolved oxygen<br>(mg/L) | Water depth<br>(cm) | Fish diversity<br>(Shannon Index) | Fish density<br>(Individuals / 3 traps) | Fish richness<br>(Species / 3 traps) | Macrophyte diversity<br>(Shannon Index) | Macrophyte density<br>(g DW/m <sup>2</sup> ) | Dominating macrophyte species<br>(>70% of the total density)                           |
|-------|---------------------------|-------------|-------------------------|----------------------------|---------------------|-----------------------------------|-----------------------------------------|--------------------------------------|-----------------------------------------|----------------------------------------------|----------------------------------------------------------------------------------------|
| 1     | 19.3 ± 0.4                | 6.75 ± 0.55 | 0.03 ± 0.009            | 4.89 ± 1.23                | 125                 | 1.43                              | 59                                      | 9                                    | 2.03                                    | 1140.5                                       | <i>E. azurea</i> (24.1%)<br><i>E. crassipes</i> (48.8%)                                |
| 2     | 19.2 ± 0.4                | 6.61 ± 0.64 | 0.02 ± 0                | 4.07 ± 0.24                | 135                 | 1.63                              | 100                                     | 9                                    | 2.22                                    | 1404.9                                       | <i>E. azurea</i> (45.3%)<br><i>O. cubense</i> (14.3%)<br><i>P. stelligerum</i> (15.7%) |
| 3     | 19.1 ± 0.7                | 6.61 ± 0.33 | 0.02 ± 0.001            | 6.00 ± 2.05                | 65                  | 1.67                              | 305                                     | 13                                   | 1.95                                    | 1752.1                                       | <i>E. azurea</i> (29.1%)<br><i>O. cubense</i> (34%)<br><i>S. biloba</i> (21%)          |
| 4     | 19.3 ± 0.5                | 6.74 ± 0.35 | 0.02 ± 0.001            | 4.23 ± 1.25                | 60                  | 1.61                              | 464                                     | 14                                   | 0.68                                    | 1370.1                                       | <i>E. azurea</i> (87.9%)                                                               |
| 5     | 19.2 ± 0.4                | 6.93 ± 0.14 | 0.02 ± 0.001            | 5.32 ± 1.89                | 70                  | 1.6                               | 17                                      | 6                                    | 0.49                                    | 1886.8                                       | <i>E. azurea</i> (92.5%)                                                               |
| 6     | 19.3 ± 0.3                | 7.07 ± 0.06 | 0.02 ± 0.001            | 5.02 ± 1.19                | 130                 | 1.32                              | 44                                      | 8                                    | 0.73                                    | 1508.5                                       | <i>E. azurea</i> (18.9%)<br><i>E. crassipes</i> (80.7%)                                |
| 7     | 19.7 ± 1.1                | 6.63 ± 0.66 | 0.03 ± 0.01             | 6.42 ± 1.39                | 55                  | 1.69                              | 157                                     | 9                                    | 0.58                                    | 1659.7                                       | <i>E. azurea</i> (92%)                                                                 |
| 8     | 19.8 ± 1.0                | 7.04 ± 0.6  | 0.02 ± 0.002            | 6.74 ± 0.85                | 75                  | 1.47                              | 395                                     | 12                                   | 0.34                                    | 1503.6                                       | <i>E. azurea</i> (94.8%)                                                               |
| 9     | 19.8 ± 1.1                | 6.98 ± 0.53 | 0.02 ± 0.003            | 6.34 ± 1.34                | 45                  | 1.91                              | 563                                     | 14                                   | 0.71                                    | 2210.2                                       | <i>E. azurea</i> (84.2%)                                                               |

|    |            |             |              |             |     |      |     |    |       |        |                                                                |
|----|------------|-------------|--------------|-------------|-----|------|-----|----|-------|--------|----------------------------------------------------------------|
|    |            |             |              |             |     |      |     |    |       |        | <i>E. crassipes</i><br>(17.7%)                                 |
| 10 | 19.9 ± 1.1 | 6.42 ± 0.45 | 0.02 ± 0.003 | 4.47 ± 2.56 | 53  | 1.55 | 25  | 6  | 0.85  | 7066.3 | <i>E. crassipes</i><br>(75.5%)<br><i>O. cubense</i><br>(23.7%) |
| 11 | 19.8 ± 0.8 | 6.71 ± 0.80 | 0.02 ± 0.001 | 6.93 ± 2.28 | 60  | 1.34 | 42  | 7  | 0.89  | 1288.1 | <i>E. azurea</i><br>(83.2%)                                    |
| 12 | 19.9 ± 1.0 | 6.69 ± 0.48 | 0.02 ± 0.001 | 5.71 ± 1.48 | 50  | 1.96 | 133 | 15 | 1.67  | 2106.6 | <i>E. azurea</i><br>(68.3%)<br><i>P. repens</i><br>(10.6%)     |
| 13 | 19.3 ± 0.8 | 6.41 ± 0.37 | 0.02 ± 0.001 | 6.23 ± 3.36 | 55  | 1.12 | 27  | 7  | 1.75  | 3062.9 | <i>E. azurea</i><br>(53.3%)<br><i>E. crassipes</i><br>(31.2%)  |
| 14 | 19.2 ± 0.7 | 6.57 ± 0.17 | 0.02 ± 0.001 | 7.9 ± 1.03  | NA  | 1.39 | 45  | 6  | 0.25  | 366.2  | <i>E. azurea</i><br>(96.1%)                                    |
| 15 | 19.2 ± 0.8 | 6.53 ± 0.29 | 0.02 ± 0.001 | 7.24 ± 1.42 | 75  | 1.54 | 15  | 6  | 0.79  | 1909.6 | <i>E. azurea</i><br>(83.9%)                                    |
| 16 | 19.2 ± 0.7 | 6.33 ± 0.43 | 0.02 ± 0     | 8.66 ± 1.49 | 60  | 1.75 | 67  | 9  | 0.005 | 940.3  | <i>E. azurea</i><br>(99.9%)                                    |
| 17 | 19.0 ± 0.9 | 6.69 ± 0.32 | 0.02 ± 0.001 | 8.89 ± 1.38 | 50  | 1.79 | 108 | 9  | 0     | 1066.7 | <i>E. azurea</i><br>(100%)                                     |
| 18 | 19.2 ± 0.9 | 6.58 ± 0.37 | 0.02 ± 0.001 | 9.19 ± 1.08 | 60  | 1.57 | 58  | 8  | 0     | 900.3  | <i>E. azurea</i><br>(100%)                                     |
| 19 | 18.5 ± 0.7 | 6.42 ± 0.18 | 0.02 ± 0     | 7.77 ± 0.29 | 135 | 1.09 | 82  | 6  | 0.23  | 2299.8 | <i>E. azurea</i><br>(96.3%)                                    |
| 20 | 18.3 ± 0.3 | 6.33 ± 0.20 | 0.02 ± 0.004 | 8.96 ± 2.89 | 95  | 0.96 | 86  | 6  | 0.62  | 3551.5 | <i>E. crassipes</i><br>(87.2%)                                 |
| 21 | 18.4 ± 0.5 | 6.22 ± 0.35 | 0.02 ± 0.012 | 7.78 ± 1.93 | 110 | 1.48 | 303 | 9  | 0.76  | 1310.5 | <i>E. azurea</i><br>(79.1%)                                    |
| 22 | 18.7 ± 0.4 | 6.45 ± 0.11 | 0.02 ± 0.001 | 7.92 ± 1.48 | 180 | 1.24 | 64  | 7  | 0.54  | 1683.5 | <i>E. azurea</i><br>(87.5%)                                    |
| 23 | 18.7 ± 0.2 | 6.48 ± 0.20 | 0.03 ± 0.007 | 7.90 ± 1.47 | 75  | 1.05 | 97  | 8  | 0.1   | 650.9  | <i>E. azurea</i><br>(98.6%)                                    |
| 24 | 18.9 ± 0.2 | 6.21 ± 0.26 | 0.03 ± 0.012 | 6.20 ± 3.57 | 220 | 1.69 | 72  | 8  | 1.88  | 1369.5 | <i>E. azurea</i><br>(37.9%)                                    |

|    |            |             |              |             |     |      |     |    |      |        |                                                                                                      |
|----|------------|-------------|--------------|-------------|-----|------|-----|----|------|--------|------------------------------------------------------------------------------------------------------|
| 25 | 19.6 ± 1.3 | 6.93 ± 0.13 | 0.05 ± 0.008 | 8.78 ± 1.82 | 190 | 1.39 | 146 | 8  | 1.01 | 1787.9 | <i>L. laevigatum</i><br>(74.5%)<br><i>S. biloba</i><br>(33.1%)                                       |
| 26 | 19.6 ± 0.9 | 7.07 ± 0.16 | 0.06 ± 0.003 | 9.43 ± 1.63 | 260 | 1.53 | 119 | 9  | 1.09 | 1562.3 | <i>E. azurea</i><br>(79.8%)                                                                          |
| 27 | 19.5 ± 0.9 | 7.09 ± 0.16 | 0.05 ± 0.005 | 8.86 ± 1.21 | 300 | 1.49 | 161 | 9  | 1.56 | 1705.7 | <i>E. azurea</i><br>(66.3%)<br><i>H. ranunculoides</i><br>(13.9%)                                    |
| 28 | 19.6 ± 0.6 | 7.28 ± 0.07 | 0.06 ± 0.001 | 8.62 ± 1.04 | 135 | 1.26 | 533 | 13 | 2.03 | 1056.5 | <i>E. crassipes</i><br>(17.9%)<br><i>P. ferrugineum</i><br>(40.1%)<br><i>P. stelligerum</i><br>(27%) |
| 29 | 19.7 ± 0.6 | 7.51 ± 0.11 | 0.06 ± 0.001 | 8.76 ± 0.88 | 270 | 1.88 | 102 | 10 | 1.27 | 933.2  | <i>E. azurea</i><br>(65.9%)<br><i>S. auriculata</i><br>(18.2%)                                       |
| 30 | 19.7 ± 0.5 | 7.43 ± 0.13 | 0.06 ± 0.002 | 8.56 ± 1.21 | 290 | 1.6  | 259 | 11 | 1.1  | 1429.1 | <i>E. azurea</i><br>(47.5%)<br><i>H. ranunculoides</i><br>(50.9%)                                    |

**Table S5** Diet composition (volume percentage) and trophic guild of fish species inhabiting aquatic macrophytes of Baía River, Brazil. N= number of stomachs analyzed.

| Species                             | N   | Higher plant | Algae | Insects | Other invertebrates | Fish  | Detritus | Trophic guild |
|-------------------------------------|-----|--------------|-------|---------|---------------------|-------|----------|---------------|
| <i>Aphyocharax anisitsi</i>         | 33  | 1.19         | 0.89  | 85.91   | 11.13               | 0.73  | 0.15     | Insetivore    |
| <i>Apistogramma combrae</i>         | 51  | 2.77         | 1.08  | 54.39   | 31.77               | -     | 9.99     | Invertivore   |
| <i>Astyanax lacustris</i>           | 2   | 40           | -     | 60      | -                   | -     | -        | Omnivore      |
| <i>Crenicichla britskii</i>         | 4   | 0.36         | -     | 97.82   | 1.82                | -     | -        | Insetivore    |
| <i>Hemigrammus ora</i>              | 77  | 55.05        | 3.82  | 33.79   | 6.65                | 0.69  | -        | Omnivore      |
| <i>Hyphessobrycon eques</i>         | 267 | 2.58         | 0.49  | 25.97   | 70.7                | 0.11  | 0.15     | Invertivore   |
| <i>Hyphessobrycon moniliger</i>     | 13  | 31.88        | 1.87  | 63.13   | 3.12                | -     | -        | Insetivore    |
| <i>Laetacara araguaiae</i>          | 46  | 26.3         | 0.78  | 64.95   | 7.8                 | -     | 0.17     | Insetivore    |
| <i>Moenkhausia bonita</i>           | 278 | 1.04         | 0.55  | 73.19   | 25.21               | -     | 0.01     | Insetivore    |
| <i>Moenkhausia forestii</i>         | 612 | 35.98        | 3.2   | 51.66   | 8.22                | -     | 0.94     | Omnivore      |
| <i>Moenkhausia sanctaefilomenae</i> | 61  | 49.93        | 3.93  | 38.89   | 7.07                | 0.18  | -        | Omnivore      |
| <i>Psellogrammus kennedyi</i>       | 50  | 66.27        | 12.8  | 11.53   | 9.12                | 0.07  | 0.21     | Herbivore     |
| <i>Pyrrhulina australis</i>         | 92  | 1.31         | 0.12  | 85.53   | 12.96               | 0.04  | 0.04     | Insetivore    |
| <i>Roeboides descaltvadensis</i>    | 5   | -            | -     | 75.49   | 10.78               | 10.78 | 2.95     | Insetivore    |
| <i>Serrapinnus calliurus</i>        | 119 | 10.47        | 49.94 | 4.66    | 27.53               | 0.46  | 6.94     | Herbivore     |
| <i>Serrapinnus notomelas</i>        | 142 | 15.61        | 45.98 | 14.15   | 19.94               | 0.24  | 4.08     | Herbivore     |

**Table S6** Results of likelihood ratio test for models regressing fish foraging efficiency assessed by the mean of the degree of stomach fullness (mDF) for macrophyte and fish attributes.

| <b>Models</b>                      | $\chi^2$ | <b>P</b> |
|------------------------------------|----------|----------|
| First order vs. Second order model | 0.01     | 0.92     |
| First order vs. Third order model  | 0.35     | 0.84     |
| Second order vs. Third order model | 0.34     | 0.56     |

**Table S7** Results of likelihood ratio test for models regressing trophic niche breadth assessed by the mean of the distance from the centroid (mDC) for macrophyte and fish attributes.

| <b>Models</b>                      | $\chi^2$ | <b>P</b> |
|------------------------------------|----------|----------|
| First order vs. Second order model | 2.07     | 0.15     |
| First order vs. Third order model  | 3.41     | 0.19     |
| Second order vs. Third order model | 1.34     | 0.25     |

**Table S8** Results of likelihood ratio test for models regressing trophic niche overlap assessed by the mean of the distance from the centroid (mDC) for macrophyte and fish attributes. \* = significant value.

| <b>Models</b>                      | $\chi^2$ | <b>P</b> |
|------------------------------------|----------|----------|
| First order vs. Second order model | 4.91     | 0.03*    |
| First order vs. Third order model  | 4.98     | 0.08     |
| Second order vs. Third order model | 0.07     | 0.78     |
